# Supplementary material
Source: Springer Nature journal article supplement (https://www.springermedizin.de/resource/supplementary/12963_2010_97_MOESM13_ESM.pdf/9572716)

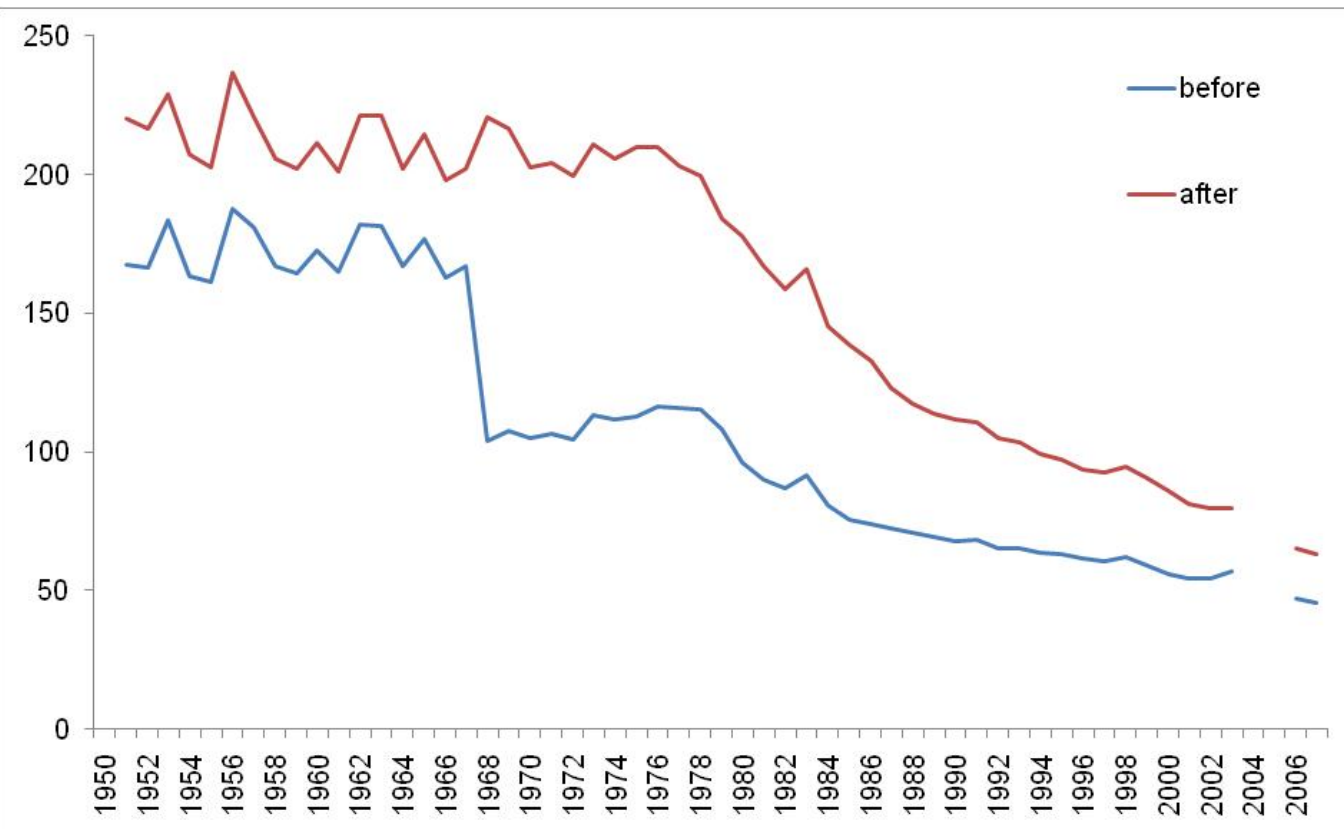

Supplement: MOESM13 [file 9572716]
